# Supplementary material for: Band engineering of Dirac materials in SbmBin lateral heterostructures
Source: Royal Society of Chemistry journal article supplement (doi:10.1039/d1ra02702f), 2021-01-01
Supplement: d1ra02702f1.pdf [file d1ra02702f1.pdf]

1

## Supporting Information

2 Table S1 the lattice constant ( $a$  and  $b$ ) and the average bond length ( $d_{\text{Sb-Sb}}$ ,  $d_{\text{Sb-Bi}}$ , and  $d_{\text{Bi-Bi}}$  denote the bond length of  
3 Sb-Sb, Sb-Bi, and Bi-Bi, respectively) of the antimonene, bismuthene, and  $\text{Sb}_m\text{Bi}_n$  LHS

|                                | $a$ (Å) | $b$ (Å) | $d_{\text{Sb-Sb}}$ (Å) | $d_{\text{Sb-Bi}}$ (Å) | $d_{\text{Bi-Bi}}$ (Å) |
|--------------------------------|---------|---------|------------------------|------------------------|------------------------|
| antimonene                     | 4.12    | 4.12    | 2.89                   | -                      | -                      |
| bismuthene                     | 4.32    | 4.32    | -                      | -                      | 3.04                   |
| $\text{Sb}_2\text{Bi}_2$       | 14.65   | 4.23    | 2.90                   | 2.97                   | 3.04                   |
| $\text{Sb}_3\text{Bi}_3$       | 22.00   | 4.24    | 2.90                   | 2.97                   | 3.04                   |
| $\text{Sb}_4\text{Bi}_4$       | 29.24   | 4.24    | 2.90                   | 2.97                   | 3.04                   |
| $\text{Sb}_5\text{Bi}_5$       | 36.53   | 4.24    | 2.90                   | 2.97                   | 3.04                   |
| $\text{Sb}_6\text{Bi}_6$       | 43.73   | 4.25    | 2.90                   | 2.97                   | 3.04                   |
| $\text{Sb}_7\text{Bi}_7$       | 51.11   | 4.24    | 2.90                   | 2.97                   | 3.04                   |
| $\text{Sb}_8\text{Bi}_8$       | 58.35   | 4.24    | 2.90                   | 2.96                   | 3.04                   |
| $\text{Sb}_9\text{Bi}_9$       | 65.64   | 4.25    | 2.90                   | 2.97                   | 3.04                   |
| $\text{Sb}_{10}\text{Bi}_{10}$ | 72.92   | 4.24    | 2.90                   | 2.97                   | 3.04                   |
| $\text{Sb}_{11}\text{Bi}_{11}$ | 80.29   | 4.25    | 2.90                   | 2.97                   | 3.04                   |
| $\text{Sb}_{15}\text{Bi}_{15}$ | 109.45  | 4.25    | 2.90                   | 2.97                   | 3.04                   |
| $\text{Sb}_{20}\text{Bi}_{20}$ | 152.94  | 4.25    | 2.90                   | 2.96                   | 3.04                   |

4

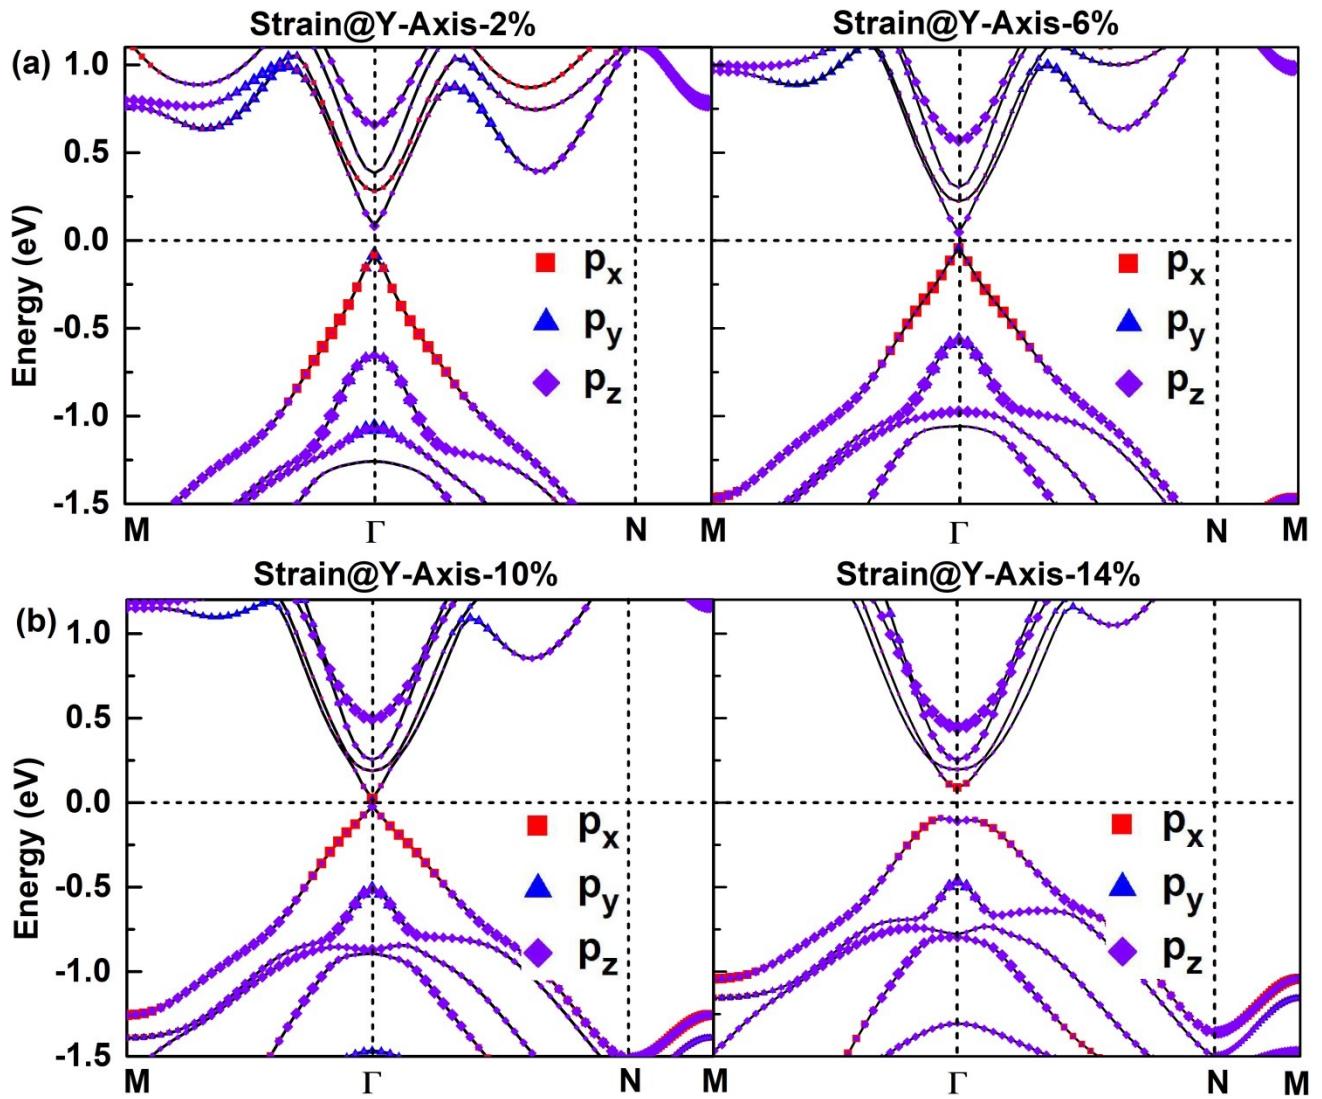

1  
2 **Fig. S1** The orbital-projected bands of strain@Y-axis of Bi atoms of  $Sb_2Bi_2$  LHS. The size of red squares, purple  
3 diamonds and blue triangles represent the weights of  $p_x$ ,  $p_y$ ,  $p_z$  orbitals, respectively.  
4  
5

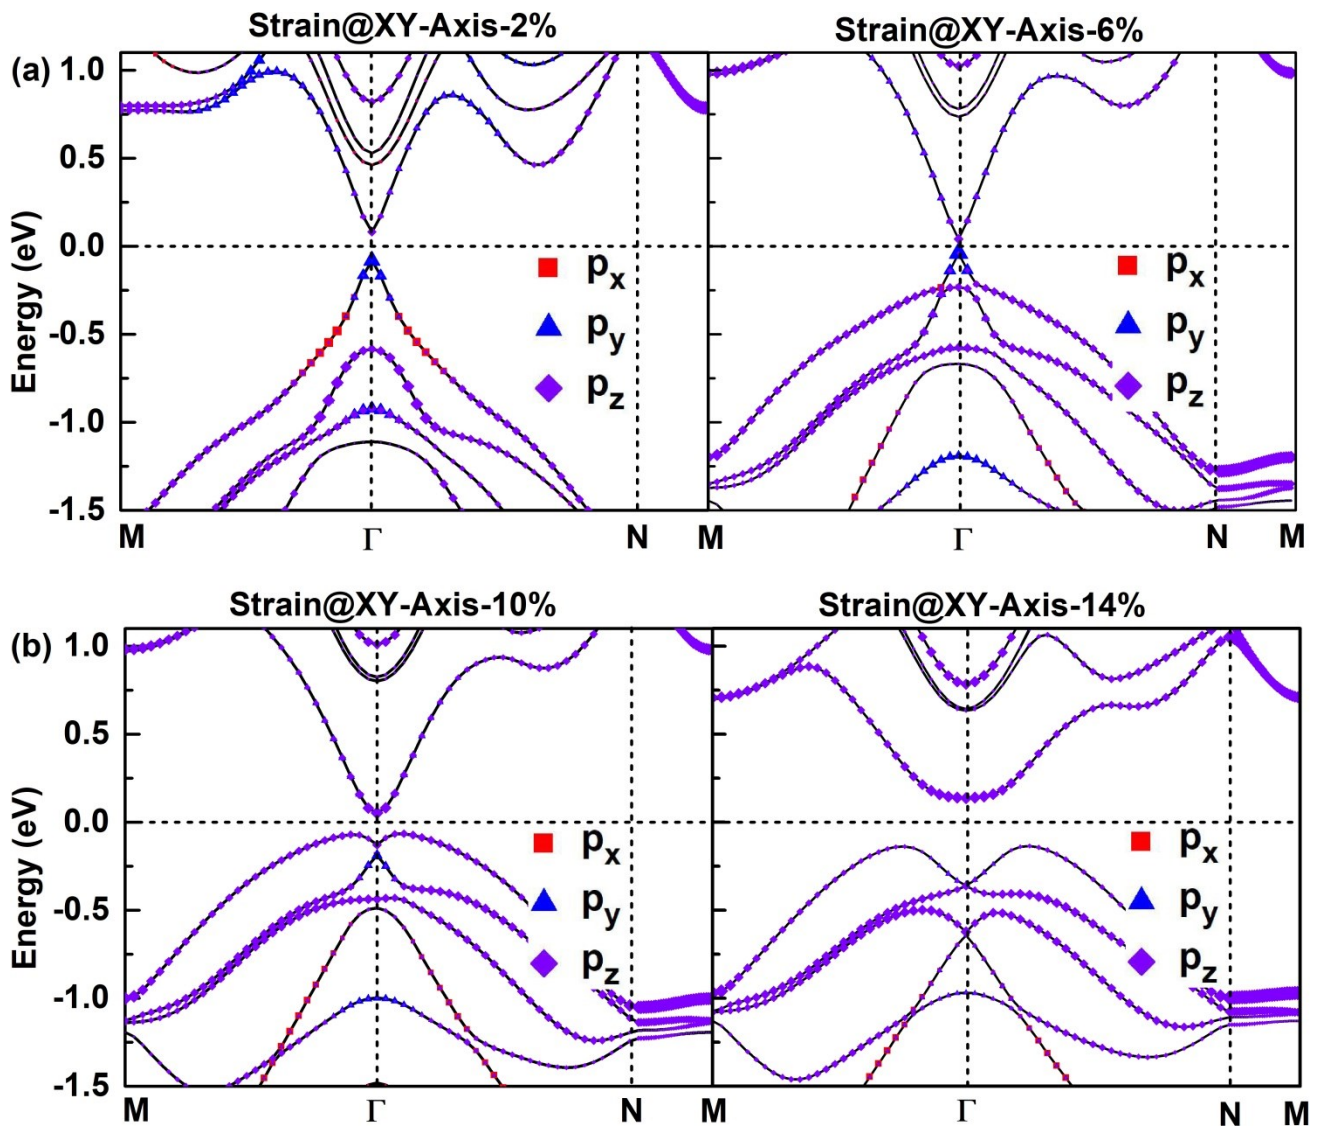

1  
2 **Fig. S2** The orbital-projected bands of strain@XY-axis of Bi atoms of  $\text{Sb}_2\text{Bi}_2$  LHS. The size of red squares, purple  
3 diamonds and blue triangles represent the weights of  $p_x$ ,  $p_y$ ,  $p_z$  orbitals, respectively.

4
